# Supplementary material
Source: publisher site journal article supplement (https://www.dovepress.com/get_supplementary_file.php?f=275660.docx)
Supplement: Supplementary file 1 [file get_supplementary_file.php]

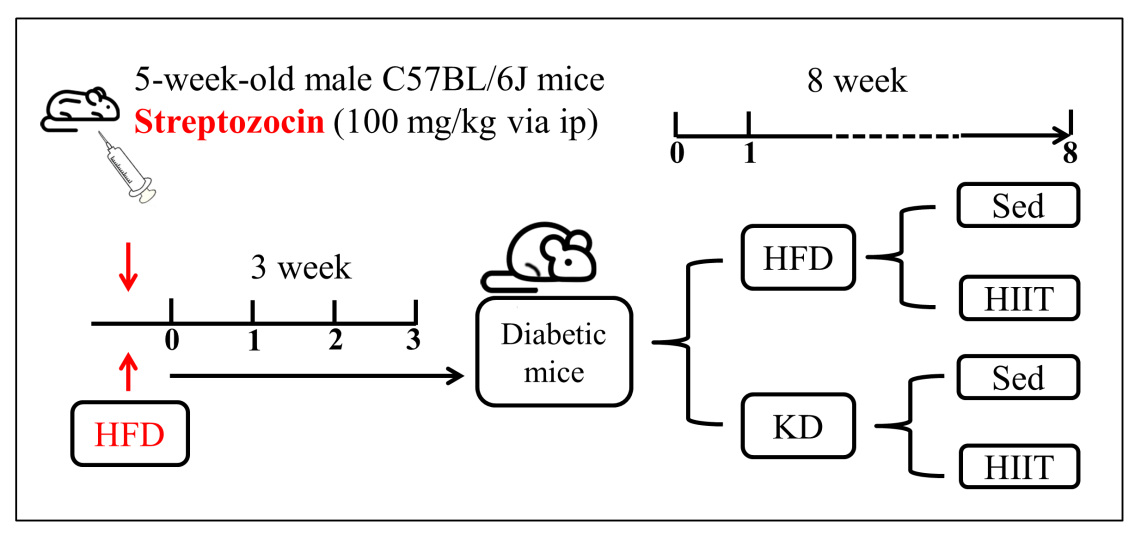
**Supplementary material**

**Supplementary Figure 1:** Experimental design.

**
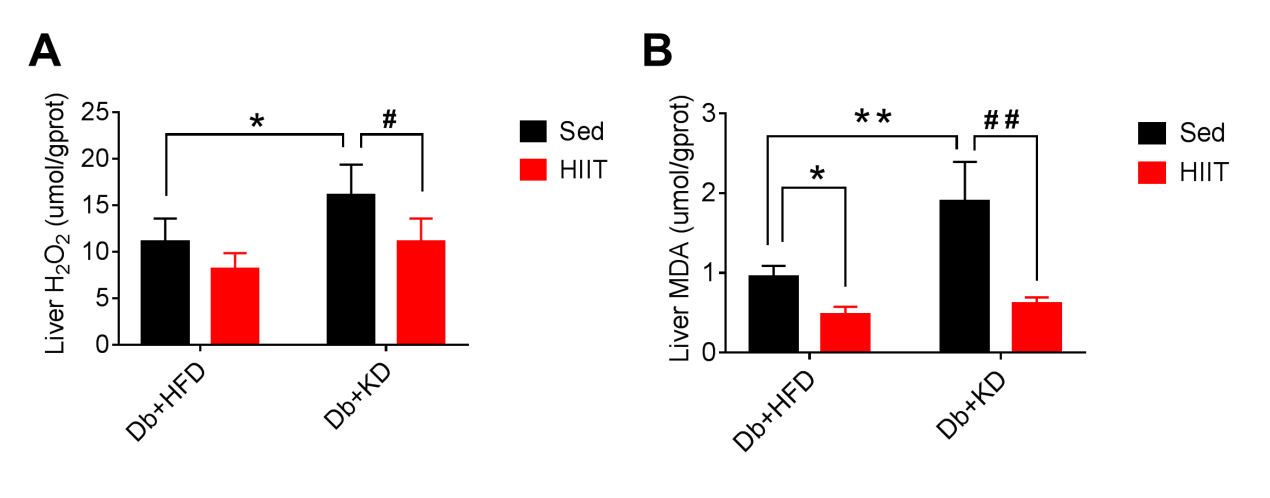
 Supplementary Figure 2:** Ketogenic diet treatment induces oxidative stress in the liver of diabetic mice. The diabetic mice were exposed to HFD or KD with or without HIIT for 8-week. (A) Liver H2O2 level and (B) Liver MDA level in the mice of Db+HFD+Sed, Db+KD+Sed, Db+HFD+HIIT, and Db+KD+HIIT group. Data were presented as means ± SD (n=6 each group). Groups were statistically compared using two-way ANOVA and Bonferroni post hoc tests. *P <0.05, **P <0.01, compared to Db+HFD+Sed group, #P <0.05, ##P <0.01, compared to Db+KD+Sed group.

**Supplementary Table 1：**Forward and reverse primer of genes

| **Gene name** | **Primer Sequence（5'to3'）** |
| --- | --- |
| *m-Col1a1-F* | TAAGGGTCCCCAATGGTGAGA |
| *m-Col1a1-R* | GGGTCCCTCGACTCCTACAT |
| *mTGFβ1-F* | CTCCCGTGGCTTCTAGTGC |
| *mTGFβ1-R* | GCCTTAGTTTGGACAGGATCTG |
| *m-Acta2-F* | CCCAACTGGGACCACATGG |
| *m-Acta2-R* | TACATGCGGGGGACATTGAAG |
| *mTimp1-F* | GTGGATATGCCCACAAGTCC |
| *mTimp1-R* | CTCAGAGTACGCCAGGGAAC |
| *mTimp2-F* | CTGGACGTTGGAGGAAAGAAG |
| *mTimp2-R* | CTGGGTGATGCTAAGCGTGTC |
| *mMmp2-F* | CAAGTTCCCCGGCGATGTC |
| *mMmp2-R* | TTCTGGTCAAGGTCACCTGTC |
| *mMmp9-F* | AGACGACATAGACGGCATCC |
| *mMmp9-R* | TGGGACACATAGTGGGAGGT |
| *m**β-actin-F* | GCAGGAGTACGATGAGTCCG |
| *mβ-actin-R* | GGGTGTAAAACGCAGCTCAG |
